# Supplementary material for: Large organized chromatin lysine domains help distinguish primitive from differentiated cell populations
Source: PubMed Central journal article supplement (PMC7820432; doi:10.1038/s41467-020-20830-9), 2021-01-21
Supplement: 41467_2020_20830_MOESM2_ESM.pdf [file 41467_2020_20830_MOESM2_ESM.pdf]

## **Description of Additional Supplementary Files**

**File Name:** Supplementary Software

**Description:** A copy of all the call peak files used to generate figures of the manuscript.
